# Supplementary material
Source: ML conference proceedings conference paper supplement (https://openreview.net/forum?id=8OFAtZzIf7T)
Supplement: supplementary_material [file attachment]

# SUPPLEMENTARY MATERIAL

**Anonymous authors**

Paper under double-blind review

## 1 LOGIT VS. CROSS-ENTROPY WITH LARGE $T$

In this part, we analysis the relation between the Logit [Zhao et al. \(2021\)](#) and the Cross-Entropy Loss function. The Logit loss function is:

$$L_{Logit} = -z_t, \quad (1)$$

where  $-z_t$  denotes the logit value of the target class  $t$ . Then we can have the gradient wrt. input feature  $\phi(\hat{x})$  as:

$$\frac{\partial L_{Logit}}{\partial \phi(\hat{x})} = -W_t. \quad (2)$$

The Cross-Entropy loss function with  $T$  is:

$$L_{CE}^T = -\log(\hat{p}_t), \quad (3)$$

where  $\hat{p}_t = \frac{e^{z_t/T}}{\sum e^{z_i/T}}$ . We can compute the gradient wrt. input feature  $\phi(\hat{x})$  as:

$$\frac{\partial L_{CE}^T}{\partial \phi(\hat{x})} = \sum_i -\hat{p}_i \frac{(W_t - W_i)}{T}. \quad (4)$$

When using a large  $T$ , the distribution  $\hat{\mathbf{p}}_i$  will be extremely smooth over different classes. And we can get the  $\hat{p}_i \approx \frac{1}{N}$  for each class, where  $N$  is the number of classes. In this study, we conduct experiments on the ImageNet dataset ( $N = 1000$ ), then Eq. 4 will become:

$$\begin{aligned} \frac{\partial L_{CE}^T}{\partial \phi(\hat{x})} &\approx \sum_i -\frac{(W_t - W_i)}{NT} \\ &\approx -\frac{W_t}{T} + \frac{1}{NT} \sum_i W_i \\ &\approx -\frac{W_t}{T}, \end{aligned} \quad (5)$$

which is approximate  $\frac{1}{T}$  of the gradient in Eq 2. On the other aspect, the I-FGSM is used for optimization,

$$\hat{x}_{i+1} = \hat{x}'_i + \alpha \cdot \text{sign}(\nabla_{\hat{x}} J(\hat{x}'_i, y)) \quad (6)$$

which only considers the sign of the gradient. Therefore, the Eq 2 and Eq 5 will update the perturbation in a similar direction.

Based on the above analysis, we can consider the Logit loss function as a special case of Cross-Entropy when using a large  $T$ . In Figure 1 and Table 1, we compare the performance of the Logit and CE ( $T=50$  &  $T=100$ ). From the Figure and the Table, we can find that the performances of the Logit and CE ( $T=50$  &  $T=100$ ) are very similar. These results verify our analysis of the relation between the Logit and the CE with large  $T$ .

## 2 THE PROBABILITIES IN MARGIN-BASED CALIBRATION

In the Margin-based calibration, we calibrate the logits by using the margin between the Top-2 logits in each iteration. The calibrated logits is:

$$\tilde{z}_i = \frac{z_i}{\hat{z}_1 - \hat{z}_2}. \quad (7)$$

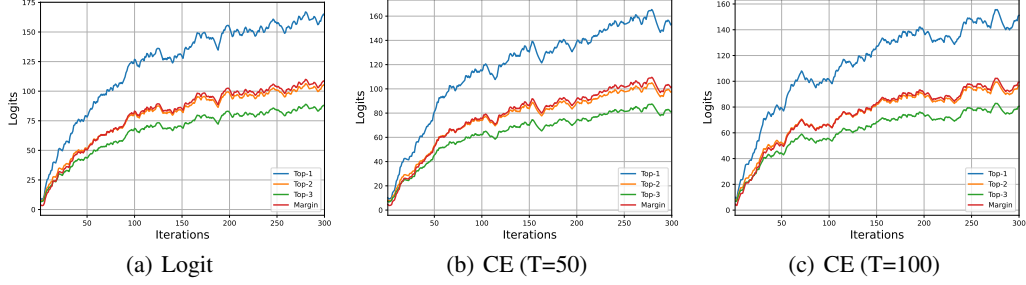

Figure 1: The average Top-3 logits and logit margin of 50 adversarial samples trained by the Logit, CE (T=50) and CE (T=100) loss functions for crafting the ResNet-50.

Table 1: Comparing the Logit with CE (T=50 & T=100) in the single-model transfer scenario. (The targeted transfer success rates (%) with 20/100/300 iterations are reported).

| Attack | Surrogate Model: ResNet50 |                |              | Surrogate Model: Dense121 |                |             |
|--------|---------------------------|----------------|--------------|---------------------------|----------------|-------------|
|        | →Dense121                 | →VGG16         | →Inc-v3      | →Res50                    | →VGG16         | →Inc-v3     |
| Logit  | 31.4/64.0/71.8            | 23.8/55.0/62.4 | 3.1/8.6/10.9 | 17.4/38.6/43.5            | 13.7/33.8/37.8 | 2.3/6.6/7.5 |
| T=50   | 30.2/64.7/72.7            | 23.3/55.1/62.9 | 2.9/8.8/11.4 | 17.3/39.6/44.8            | 12.7/34.3/38.3 | 2.4/6.7/8.3 |
| T= 100 | 30.0/64.7/72.3            | 22.8/54.4/61.9 | 3.1/8.7/10.7 | 17.0/39.7/44.7            | 13.0/33.7/39.1 | 2.2/6.5/8.1 |
| Attack | Surrogate Model: VGG16    |                |              | Surrogate Model: Inc-v3   |                |             |
|        | →Res50                    | →Dense121      | →Inc-v3      | →Res50                    | →Dense121      | →VGG16      |
| Logit  | 3.4/9.9/11.6              | 3.5/12.0/13.9  | 0.3/1.0/1.3  | 0.6/1.1/2.0               | 0.6/1.9/3.0    | 0.6/1.5/2.8 |
| T=50   | 3.1/10.2/11.4             | 3.9/12.0/14.5  | 0.1/1.1/1.3  | 0.6/1.8/2.1               | 0.6/2.0/3.0    | 0.3/1.7/2.7 |
| T= 100 | 3.6/9.8/11.3              | 3.4/11.8/13.9  | 0.4/1.2/1.4  | 0.6/1.6/2.0               | 0.4/2.1/3.0    | 0.4/1.7/2.8 |

where  $\hat{z}$  represents the sorted logits. Suppose the  $\tilde{z}$  is sorted, the Top-1 logit  $\tilde{z}_1$  will be the target class  $\tilde{z}_t$  after a few iterations. Therefore, the corresponding calibrated probability of the target class will be:

$$\begin{aligned}
 p_t &= \frac{1}{1 + \sum_{i \neq t} e^{-(\tilde{z}_t - \tilde{z}_i)}} \\
 &= \frac{1}{1 + e^{-(\tilde{z}_t - \tilde{z}_1)} + \sum_{i=2} e^{-(\tilde{z}_t - \tilde{z}_i)}} \\
 &= \frac{1}{1 + e^{-\frac{\tilde{z}_t - \tilde{z}_2}{\tilde{z}_t - \tilde{z}_2}} + \sum_{i=2} e^{-(\tilde{z}_t - \tilde{z}_i)}} \\
 &< \frac{1}{1 + e^{-1}}.
 \end{aligned} \tag{8}$$

Correspondingly, we can have the probability of  $1 - p_t > 1 - \frac{1}{1 + e^{-1}}$ . Therefore, the probability  $p_{\bar{1}}$  of the Top-1 non-target class will be larger than the average probability of all non-target classes, denoted as:

$$p_{\bar{1}} = \frac{1}{e^{\tilde{z}_1 - \tilde{z}_t} + \sum_{i \neq t} e^{\tilde{z}_i - \tilde{z}_1}} > \frac{1}{N-1} \left(1 - \frac{1}{1 + e^{-1}}\right). \tag{9}$$

Therefore, our Margin-based calibration can adaptively deal with the vanishing gradient issue in the original CE loss function.

### 3 MORE EXPERIMENTAL RESULTS

#### 3.1 THE TARGETED TRANSFER SUCCESS USING RESNET-18 AS THE SURROGATE MODEL

In Table 1 of the main manuscript, we can find that a large “T” is preferred to achieve better performance in the VGG16 when using the Margin-based calibration. We guess the main reason for

this phenomenon is mainly due to the influence of model depth. For the CNN models with fewer layers, a large normalization factor “T” is preferred to achieve higher targeted transferability. In our Margin-based calibration, the denominator “T” (logit margin between the first and second logits) will keep increasing along with the optimization iterations and thus leads to better performance.

To further check the influence of model depth, we leverage the ResNet-18 with fewer convolution layers as the surrogate model and report the results in the following Table 2. We also find that a large T can achieve better performance in the margin-based calibration. These results may suggest that a large “T” is preferred to CNNs with few layers.

Table 2: The targeted transfer success rate (%) with the ResNet-18 as the surrogate model.

| Attack | Inc-v3        | ResNet-50      | Dense-121      | VGG-16         |
|--------|---------------|----------------|----------------|----------------|
| CE     | 2.1/3.0/3.0   | 19.2/24.0/26.0 | 18.6/24.0/24.6 | 15.9/19.3/19.0 |
| CE/5   | 3.9/10.8/11.9 | 27.8/60.7/63.6 | 27.2/57.5/61.6 | 23.7/53.0/56.6 |
| CE/10  | 3.6/11.2/13.2 | 25.9/59.7/66.9 | 25.9/57.2/64.2 | 22.2/53.0/59.7 |
| CE/20  | 3.9/11.4/13.0 | 25.2/57.8/64.2 | 24.8/54.3/60.7 | 21.1/49.7/57.1 |
| Margin | 4.1/11.3/13.1 | 27.3/60.1/65.3 | 27.3/57.3/62.9 | 23.4/53.5/58.6 |
| Angle  | 3.7/8.2/8.4   | 27.1/51.5/54.3 | 28.1/52.8/55.7 | 23.9/44.9/46.2 |
| Logits | 3.7/10.0/12.2 | 24.8/55.6/60.7 | 24.3/53.6/58.5 | 21.2/49.4/54.9 |

### 3.2 THE EFFECTIVE OF USING LOGIT CALIBRATION IN NON-TARGETED ATTACK

We further conduct the experiments on the CIFAR-10 dataset under the untargeted attack setting based on the code provided by Huang et al. (2019). The ResNet-18 is used as the white-box model for crafting the perturbation by training with the I-FGSM for 20 iterations. The DenseNet, GoogLeNet and SENet18 are black-box models. Table 3 reported the fooling rate of attacking the 10,000 images in the CIFAR-10 testing set.

From Table 3, we can find that the fooling rate continually increases along with the T in the white-box attack. In transfer black-box attacks, the best fooling rates are obtained at T=5 or T=10, and the fooling rate will decrease when further increasing T. These results also can validate the effectiveness of logit calibration in non-targeted attacks on a small dataset.

Table 3: The transfer untargeted fooling rate of training with ResNet-18 and testing by the DenseNet-121, GoogleNet and SENet-18 on CIFAR-10.

|       | ResNet-18* | DenseNet-121 | GoogLeNet | SENet-18 |
|-------|------------|--------------|-----------|----------|
| T=0.5 | 89.77      | 50.23        | 37.43     | 51.04    |
| T=1   | 91.61      | 50.78        | 37.30     | 51.20    |
| T=2   | 91.39      | 51.14        | 37.60     | 51.65    |
| T=5   | 92.01      | 55.56        | 41.77     | 55.74    |
| T=10  | 94.04      | 54.76        | 42.41     | 55.10    |
| T=20  | 94.20      | 53.33        | 41.31     | 54.11    |

### 3.3 COMPARISON WITH THE TTP METHOD

In this section, we further evaluate the proposed temperature-based logit calibration in the GAN-based targeted attacks. Following the setting in TTP Naseer et al. (2021), we sample 50K images from the ImageNet training set and 50K images from the Painting dataset<sup>1</sup>, which are used to train the targeted generators from different source domains. Instead of using the distribution matching and neighborhood similarity matching loss Naseer et al. (2021), we only use the cross-entropy function for training the targeted generators while keeping other settings identical. More training and evaluation details used by TTP can be referred to Naseer et al. (2021). We use the ResNet50 as the surrogate model and report the results in Table 4.

From Table 4, we make the following findings. 1) By using ImageNet as the training dataset, the TTP shows better transferability than the CE in attacking other black-box models. The average targeted

<sup>1</sup><https://www.kaggle.com/c/painter-by-numbers>

Table 4: **Comparison with TTP (Naseer et al., 2021) on Target Transferability.** The averaged Top-1 targeted accuracy (%) across 10 targets are computed with 49.95K ImageNet validation samples. Perturbation budget:  $l_\infty \leq 16$ . \* indicates the training surrogate model.

| Dataset  | Loss     | ResNet50*     | VGG19 <sub>BN</sub> | Dense121     | ResNet152    | WRN-50-2     | Average      |
|----------|----------|---------------|---------------------|--------------|--------------|--------------|--------------|
| ImageNet | TTP      | 97.02*        | 78.15               | 81.64        | 80.56        | 78.25        | 83.12        |
|          | CE       | 97.15*        | 70.44               | 78.96        | 76.22        | 78.24        | 80.20        |
|          | CE (T=5) | <b>99.18*</b> | <b>86.65</b>        | <b>90.55</b> | <b>90.30</b> | <b>93.22</b> | <b>91.98</b> |
| Painting | TTP      | 96.63*        | 73.09               | 84.76        | 76.27        | 75.92        | 81.33        |
|          | CE (T=5) | <b>98.95*</b> | <b>82.97</b>        | <b>87.07</b> | <b>87.81</b> | <b>91.70</b> | <b>89.70</b> |

accuracy of TTP is around 3% higher than that of CE. **2)** After downscaling the logit by 5 in the CE loss function (CE (T=5)), we can observe a significant boost of the Top-1 targeted accuracy for all models, reaching the average targeted accuracy of 91.98% (ImageNet). **3)** For both ImageNet and Painting as the training source, the CE (T=5) can surpass the TTP by a large margin (91.98% vs. 83.12% & 89.70% vs. 81.33%). These experimental results demonstrate that the proposed temperate-based logit calibration is also effective in training generator-based targeted attackers. Note that, compared to TPP, our logit calibration has the benefit of without using any data from the target class.

## REFERENCES

- Qian Huang, Isay Katsman, Horace He, Zeqi Gu, Serge Belongie, and Ser-Nam Lim. Enhancing adversarial example transferability with an intermediate level attack. In *ICCV*, 2019.
- Muzammal Naseer, Salman Khan, Munawar Hayat, Fahad Shahbaz Khan, and Fatih Porikli. On generating transferable targeted perturbations. In *ICCV*, 2021.
- Zhengyu Zhao, Zhuoran Liu, and Martha Larson. On success and simplicity: A second look at transferable targeted attacks. *NeurIPS*, 34, 2021.
